# Supplementary material for: Association between Prenatal Dietary Toxicants and Infant Neurodevelopment: The Role of Fish
Source: MDPI journal article supplement (doi:10.3390/toxics12050338), 2024-05-06
Supplement: s1 [file s1]

**Supplementary table S1.** Beta-coefficient and 95% confidence interval for the association between maternal toxicants intake from fish with motor and cognitive development of 40 days newborns

|                 | Motor scale       |       | Fine motor subscale |       | Gross motor subscale |       | Cognitive scale    |       |
|-----------------|-------------------|-------|---------------------|-------|----------------------|-------|--------------------|-------|
|                 | $\beta$ (95%CI)   | P     | $\beta$ (95%CI)     | P     | $\beta$ (95%CI)      | P     | $\beta$ (95%CI)    | P     |
| <b>As</b>       |                   |       |                     |       |                      |       |                    |       |
| crude           | 0.06 (0.00~0.13)  | 0.059 | 0.00 (-0.01~0.01)   | 0.748 | 0.01 (-0.01~0.03)    | 0.193 | -0.01 (-0.06~0.04) | 0.650 |
| Model 1         | 0.06 (-0.01~0.14) | 0.091 | 0.00 (-0.02~0.01)   | 0.696 | 0.02 (-0.01~0.04)    | 0.094 | -0.03 (-0.08~0.03) | 0.363 |
| <b>InAs</b>     |                   |       |                     |       |                      |       |                    |       |
| crude           | 0.32 (-0.11~0.75) | 0.142 | 0.00 (-0.07~0.08)   | 0.920 | 0.09 (0.00~0.17)     | 0.057 | -0.10 (-0.43~0.23) | 0.560 |
| Model 1         | 0.30 (-0.18~0.77) | 0.218 | -0.03 (-0.11~0.05)  | 0.516 | 0.10 (0.00~0.19)     | 0.053 | -0.20 (-0.56~0.17) | 0.297 |
| <b>Cd</b>       |                   |       |                     |       |                      |       |                    |       |
| crude           | 0.30 (-0.12~0.71) | 0.160 | 0.02 (-0.05~0.09)   | 0.541 | 0.06 (-0.03~0.14)    | 0.175 | 0.04 (-0.28~0.36)  | 0.815 |
| Model 1         | 0.16 (-0.26~0.58) | 0.461 | -0.01 (-0.08~0.07)  | 0.878 | 0.04 (-0.05~0.13)    | 0.387 | 0.00 (-0.33~0.33)  | 0.985 |
| <b>MeHg</b>     |                   |       |                     |       |                      |       |                    |       |
| crude           | 0.20 (-0.24~0.63) | 0.371 | -0.01 (-0.08~0.07)  | 0.857 | 0.06 (-0.03~0.15)    | 0.194 | -0.12 (-0.46~0.21) | 0.470 |
| Model 1         | 0.17 (-0.30~0.65) | 0.478 | -0.03 (-0.12~0.05)  | 0.409 | 0.07 (-0.03~0.16)    | 0.180 | -0.21 (-0.58~0.15) | 0.253 |
| <b>Pb</b>       |                   |       |                     |       |                      |       |                    |       |
| crude           | 0.22 (-0.02~0.46) | 0.070 | 0.01 (-0.03~0.05)   | 0.514 | 0.05 (0.00~0.10)     | 0.054 | 0.01 (-0.18~0.19)  | 0.928 |
| Model 1         | 1.52 (-0.96~3.99) | 0.229 | -0.04 (-0.46~0.39)  | 0.863 | 0.40 (-0.11~0.91)    | 0.126 | -0.21 (-2.13~1.72) | 0.835 |
| <b>PCDD/Fs</b>  |                   |       |                     |       |                      |       |                    |       |
| crude           | 0.46 (-0.17~1.08) | 0.148 | 0.01 (-0.10~0.12)   | 0.881 | 0.12 (-0.01~0.25)    | 0.071 | -0.12 (-0.60~0.36) | 0.621 |
| Model 1         | 0.38 (-0.30~1.06) | 0.272 | -0.04 (-0.16~0.08)  | 0.512 | 0.12 (-0.02~0.26)    | 0.086 | -0.25 (-0.78~0.28) | 0.353 |
| <b>DL-PCBs</b>  |                   |       |                     |       |                      |       |                    |       |
| crude           | 0.04 (-0.08~0.16) | 0.503 | 0.00 (-0.02~0.02)   | 0.813 | 0.01 (-0.01~0.04)    | 0.318 | -0.03 (-0.12~0.06) | 0.486 |
| Model 1         | 0.03 (-0.10~0.15) | 0.670 | -0.01 (-0.03~0.01)  | 0.382 | 0.01 (-0.01~0.04)    | 0.335 | -0.05 (-0.15~0.04) | 0.284 |
| <b>NDL-PCBs</b> |                   |       |                     |       |                      |       |                    |       |
| crude           | 0.07 (-0.05~0.20) | 0.248 | 0.00 (-0.02~0.02)   | 0.957 | 0.02 (-0.01~0.05)    | 0.116 | -0.03 (-0.13~0.06) | 0.508 |
| Model 1         | 0.07 (-0.07~0.20) | 0.349 | -0.01 (-0.03~0.01)  | 0.446 | 0.02 (-0.01~0.05)    | 0.109 | -0.06 (-0.17~0.05) | 0.269 |

a, 10 units increase; b, 0.01 units increase; c, 0.1 units increase. Abbreviations: As, arsenic; InAs, inorganic arsenic; Cd, cadmium; MeHg, methylmercury; Pb, lead; PCDD/Fs, polychlorinated dibenzo-p-dioxins and dibenzofurans; DL-PCBs, dioxin-like polychlorinated biphenyls; NDL-PCBs, non-dioxin-like polychlorinated biphenyls.

Model 1 adjusted by age (years), BMI (normal weight, overweight, obesity), gestational weight gain (kg), social class (low/middle, high) smoking status (never/ ex-smoker, smoker), Mediterranean Diet adherence during pregnancy (score), energy intake during pregnancy (kcal/d), total serum n-3 PUFA ( $\mu\text{mol/L}$ ), red blood cell folate (nmol/L), serum ferritin (microgr/L), serum VitB12 (pg/mL), serum VitD (ng/mL), iron supplementary (mg/day), State-trait anxiety inventory (score), newborn gender (male, female), type of feeding (breastfeeding, mixed feeding/infant formula).

**Supplementary table S2.** Beta-coefficient and 95% confidence interval for the association between maternal fish intake according to Spanish guideline recommendations and language development of 40 days newborns

|                     |         | Motor scale       |       | Fine motor subscale |       | Gross motor subscale |       | Cognitive scale    |       |
|---------------------|---------|-------------------|-------|---------------------|-------|----------------------|-------|--------------------|-------|
| Seafood consumption |         | β (95%CI)         | P     | β (95%CI)           | P     | β (95%CI)            | P     | β (95%CI)          | P     |
| <54 grams/d (ref.)  |         |                   |       |                     |       |                      |       |                    |       |
| 54-71 grams/d       | Crude   | 1.91 (-1.11~4.93) | 0.214 | 0.03 (-0.49~0.55)   | 0.910 | 0.60 (-0.03~1.22)    | 0.060 | 1.73 (-0.60~4.05)  | 0.146 |
| >71 grams/d         |         | 2.05 (-0.80~4.90) | 0.159 | 0.10 (-0.39~0.59)   | 0.683 | 0.53 (-0.06~1.12)    | 0.076 | -0.30 (-2.50~1.89) | 0.786 |
| <54 grams/d (ref.)  |         |                   |       |                     |       |                      |       |                    |       |
| 54-71 grams/d       | Model 1 | 2.07 (-1.04~5.18) | 0.193 | -0.03 (-0.56~0.50)  | 0.919 | 0.70 (-0.06~1.33)    | 0.053 | 1.87 (-0.54~4.28)  | 0.128 |
| >71 grams/d         |         | 1.69 (-1.43~4.81) | 0.288 | -0.09 (-0.63~0.44)  | 0.733 | 0.54 (-0.10~1.19)    | 0.097 | -0.76 (-3.18~1.66) | 0.539 |

Abbreviations: d, day; ref., reference.

Model 1 adjusted by age (years), BMI (normal weight, overweight, obesity), gestational weight gain (kg), social class (low/middle, high) smoking status (never/ ex-smoker, smoker), Mediterranean Diet adherence during pregnancy (score), energy intake during pregnancy (kcal/d), total serum n-3 PUFA (μmol/L), red blood cell folate (nmol/L), serum ferritin (microgr/L), serum VitB12 (pg/mL), serum VitD (ng/mL), iron supplementary (mg/day), State-trait anxiety inventory (score), newborn gender (male, female), type of feeding (breastfeeding, mixed feeding/infant formula).
